# Supplementary material for: Acceleration of chemical shift encoding-based water fat MRI for liver proton density fat fraction and T2* mapping using compressed sensing
Source: PLoS One. 2019 Nov 15;14(11):e0224988. doi: 10.1371/journal.pone.0224988 (PMC6857925; doi:10.1371/journal.pone.0224988)
Supplement: S1 Table — (XLSX) [file pone.0224988.s001.xlsx]

## Sheet: Tabelle1
Patient	FATFRACTION in %	FSI mDIX quant	FSI cs4 mDIX quant	FSII mDIX quant	FSII cs4 mDIX quant	FSIII mDIX quant	FSIII cs4 mDIX quant	FSIVa mDIX quant	FSIVa cs4 mDIX quant	FSIVb mDIX quant	FSIVb cs4 mDIX quant	FSV mDIX quant	FSV cs4 mDIX quant	FSVI mDIX quant	FSVI cs4 mDIX quant	FSVII mDIX quant	FSVII cs4 mDIX quant	FSVIII mDIX quant	FSVIII cs4 mDIX quant	T2*in ms	2SI mDIX quant	2SI cs4 mDIX quant	2SII mDIX quant	2SII cs4 mDIX quant	2SIII mDIX quant	2SIII cs4 mDIX quant	2SIVa mDIX quant	2SIVa cs4 mDIX quant	2SIVb mDIX quant	2SIVb cs4 mDIX quant	2SV mDIX quant	2SV cs4 mDIX quant	2SVI mDIX quant	2SVI cs4 mDIX quant	2SVII mDIX quant	2SVII cs4 mDIX quant	2SVIII mDIX quant	2SVIII cs4 mDIX quant
1		5.7	5.6	7.6	6.2	5.4	5.3	6	5.7	6.9	5.5	8.1	9.1	9.2	9.2	10.2	11	9.2	9.2		19.45	21.62	16.09	16.12	18.62	15.32	20.68	19.84	19.17	19.16	20.1	19.6	17.56	18.95	20.16	20.12	19.89	19.71
2		10.2	8.5	7.3	9.3	9.4	6.7	5.7	8.1	5.4	1.8	9.1	5.5	11.1	10.8	11.3	9.3	12.1	10.1		9.25	9.68	8.99	8.66	8.5	9.74	9.25	9.76	8.02	10.27	9.95	10.61	9.35	9.28	7.94	9.28	9.19	9.79
3		5.1	4	12.7	6.5	8.5	8.2	7.7	7.9	4.8	6.1	4.6	5.1	6.1	6.6	5.8	5.6	5.4	6.8		22.69	30.6	12.64	11.96	31.61	13.95	24.13	24.14	26.96	26.21	25.44	27.09	28.66	24.09	28.41	21.96	24.88	23.35
4		5.2	8	5.9	12.9	8.1	8.8	6.7	5.5	4.7	4.8	9.5	8.5	9.8	11	8.5	9.5	9.8	8.5		26.46	30.59	20.87	11.66	26.8	23.26	32.09	22.28	34.87	42.56	21.31	23.07	29.88	22.22	26.72	26.69	22.03	22.81
5		1.4	3.4	3.6	0.2	2.9	1.1	3.4	3.4	2.2	2.9	3.6	2.8	2.9	3.2	4.5	3.2	2.6	2.9		24.68	23.58	17.4	21.7	19.15	21.87	22.02	20.98	25.56	27.11	30.07	27.37	17.27	19.66	17.71	23.58	22.95	25.71
6		1.5	2.9	0.9	2.5	1.7	2.7	2.6	3.5	2.9	2.5	2	2.9	4.8	4.8	4.5	4.3	6.4	2.9		26.09	27.4	17.37	26.58	31.25	27.88	24.87	26.09	27.47	26.06	30.62	28.6	27.13	24.91	25.2	26.9	21.62	26.68
7		2.1	1.9	2.1	2	1.1	0.3	1.9	1.5	2.9	3	1	1	0.5	1.7	4.2	5.7	1.5	2.3		20.67	19.44	17.89	19.11	20.25	23.05	21.68	20.22	18.97	21.8	22.61	18.58	23.03	21.56	21.23	19.66	20.79	19.38
8		12.5	11.2	13	12.8	11.2	12.7	10.7	11.3	12.4	13.8	14.4	13.7	14.7	14.7	14.1	13.2	14.9	13.1		20.5	19.34	19.26	16.6	18.53	19.48	20.64	17.82	21.65	23.28	20.44	18.69	18.86	19.17	18.38	18.43	20.44	22.51
9		3.8	3.8	3.5	3.5	1.8	1.8	4.1	0.7	1.3	1.4	0.5	5.2	4.1	8.1	0.8	2.4	1.3	2		3.75	5.84	5.02	5.97	5.23	5.36	5.35	5.66	5.73	5.74	8.22	6.7	3.94	5.23	4.03	5.56	7.91	5.67
10		6.6	6.3	3.5	3.4	5.4	4.8	5.8	4.8	7.5	9.1	9.1	9.8	5.8	6.4	2.8	7.2	8.5	8.7		16.82	19.61	18.2	17.6	17.45	16.86	14.93	13.32	15.87	15.12	17.94	18.26	20.66	19.67	20.44	19.98	18.25	16.3
11		6.3	6.4	8.3	8.3	6.5	8.3	5.5	5.6	9.6	8	9.1	10.1	13.8	12.8	12.7	12.8	8.1	9.5		21.89	24.76	23.73	20.9	21.83	22.68	21.91	17.52	22.72	23.2	21.77	20.35	21.41	21.46	21.68	20.26	21.64	20.47
12		19.5	16.8	23	25	22.2	24.8	25.7	26.9	25.9	25.6	31.6	32.6	25.7	23.8	32	30.6	31.7	29		26.11	26.78	18.74	22.18	16.59	15.3	31.83	29.1	22.28	11.73	20.56	20.29	29.71	27.85	21.38	24.67	21.34	20.86
13		4.2	1.4	2.1	2.8	1.4	0.4	2.5	3	3.2	1.6	3.2	0.9	2.6	3.2	1.3	0.5	2.8	1.6		27.15	36.74	18.79	19.19	28.11	30.16	27.14	34.93	26.94	24	30.03	33.26	31.24	23.21	30.34	23.51	32.12	43.76
14		3.4	4.4	4.3	4.4	6.1	5.5	2.8	3.5	2.6	3.1	3.7	3.2	6.7	5.2	5.5	4.1	4.7	4.3		22.31	28.77	16.51	15.98	18.51	28.03	19.58	25.61	26.31	42.54	33.5	31.4	31.73	33.02	29.98	34.81	29.35	27.26
15		3.6	4.9	4.3	3.5	1.7	0.6	1.7	2.8	1.4	1.7	2.9	4.3	3.6	2.8	3.4	4.8	1.8	3.3		6.47	8.72	7.56	7.11	7.89	7.56	7.93	7.06	7.4	7.01	7.87	7.63	8.19	8.12	8.07	8.05	8.01	7.66
16		3.8	4	1.3	2.1	4.5	1.8	3.9	2.3	3.4	2.9	3	3	2.4	2.3	3.6	2.4	3.2	2		28.46	30.89	26.95	29.08	30.56	29.98	27.83	37.44	27.88	32.55	30.31	31.18	31.18	31.12	32.51	37.8	30	36
17		1.9	3.2	1.6	1.7	0.9	3.2	1.9	3.4	0.6	0.8	2.7	2.2	2.1	4.7	2.1	3.5	3.8	2.6		39.7	25.31	24.97	22.43	23.82	21.88	22.34	36.35	23.23	23.19	25.04	24.12	25.46	26.88	28.11	26.96	26.2	32.09
18		4.1	3.5	3	4.7	2.2	2.7	2.8	4.1	0.8	3.5	1.9	2.3	3.8	4.6	3	4	3.5	4.6		19.04	25.24	14.54	15.2	12.77	16.12	16.7	14.56	19.39	19.6	18.91	22.31	19.46	18.29	20.23	16.84	18.39	17.48
19		3.8	2.6	6.7	0.4	2.1	4.3	2.5	2.8	4	5.1	3.6	2.6	4.5	4	2.9	3	3.7	4.2		31.35	22.15	25.49	22.13	22.18	30.49	22.79	27.9	27.28	27.98	20.07	29.22	26.03	34.59	25.23	27.12	23.22	22.23
20		18.1	14.6	20.5	17.1	20	17.3	19	17.1	22	19	20.1	19.4	20.7	18.7	19.2	17.1	17.8	18.3		24.63	28.25	25.68	17.54	21.75	19.15	19.91	31.31	26.87	27.69	27.64	25.46	23.92	25.55	24.69	21.14	23.66	26.45
21		3.3	1.9	2.7	3.2	3.1	2.3	1.7	2	1.4	2	2.7	1.3	3.5	3.7	4.6	1.4	3.3	3.2		33.68	44.34	26.6	28.24	30.38	22.26	30.82	23.99	27.33	32.75	28.97	30.96	32.36	26.5	35.32	31.56	29.04	25.73
22		2.3	2.1	3.3	5.7	2	2.5	2.5	3.1	2.6	2.4	2.4	3	3.3	2.7	3.3	5.1	2.9	3.4		26.51	24.45	22.26	38.19	28.46	26.86	27.52	27.68	28.61	30.72	29.83	33.52	31.75	36.37	26.65	27.89	27.79	28.72
23		6.4	2.6	3.9	4.8	0.9	4.3	4.2	5.3	2.3	3.9	4.9	6.1	6.3	5.8	6.4	4.9	6.8	4.3		34.65	26.66	25.34	33.03	25.95	23.86	23.35	15.83	22.72	29.39	27.09	55.85	23.05	23.94	23.54	23.55	20.79	23.79
24		6.3	4.7	3.6	5.5	5.3	6.8	7.4	7.1	5.2	4.9	6.2	6	7.9	5.9	8.8	8.6	7.8	8		34.28	27.71	36.42	38.76	27.46	20.65	32.48	37.82	34.48	31.06	32.41	34.04	38.61	36.85	37.85	38.49	39.14	32.67
25		4.3	2.1	5.5	3.9	6.1	3.7	6.3	2.8	5.5	4.8	6.8	6.3	6.3	4.6	7.4	6.9	7.2	5.8		30.09	28.82	26.7	31.12	29.41	28.66	23.02	26.38	27.32	29.57	29.33	32.58	27.95	26.83	25.16	28.35	27.44	27.71
26		4.4	2.1	6.6	1.7	1.6	6.2	6.7	6.2	6.4	6.2	7.2	7.6	5.1	5.6	6	5.2	7.5	7.9		23.04	31.43	21.34	31.13	30.63	29.39	21.13	18.7	23.4	24.66	26.45	26.37	23.16	21.17	24.64	25.89	23.27	24.95
27		2.3	2.8	2.7	2.9	3.6	2.9	1.3	2.6	2.5	2	3.6	4.5	5.1	4.5	4.4	4.8	3.1	2.3		22.2	20.92	22.57	28.36	17.42	19.86	21.41	24.22	22.31	24.46	23.88	20.74	21.36	25.16	24.49	20.38	21.05	21.84
28		6.8	3.9	2.6	5.6	5.9	4.9	4.7	9.5	3.6	5.8	4.4	3.6	4.4	5.7	4.5	3.8	3.5	3.9		15.12	17.03	10.83	16.41	15.6	14.54	13.77	15.92	22.7	16.44	17.54	17.01	15.54	15.37	16.34	16.34	16.43	15.91
29		1.8	2.5	1.4	0.9	0.4	0.4	2	2.4	1.9	1	1	0.9	2.5	2.5	4	3.2	1.8	2.1		24.05	28.22	30.37	32.33	34.72	41.22	33.92	23.26	34.95	45.33	31.23	31.31	23.86	35.65	32.48	25.61	28.25	25.13
30		1.4	1.8	6.7	5.1	0.3	1.6	3	3.8	1.6	1.1	2.8	3.7	3	3.5	2.5	4.3	3.4	4		24.15	26.24	14.34	21.26	29.02	25.09	26.1	26.41	23.18	23.04	25.95	24.61	23.96	28.65	25.46	22.74	25.32	21.57
31		5.7	4	5.3	4.8	9.4	9	8.5	8.8	4.9	3.4	6.3	5	8.2	8.4	7.3	7.4	7.5	8		19.95	17.84	24.57	28.99	20.43	18.82	20.38	21.41	22.06	22.79	21.79	23.05	21.89	21.78	21.93	21.11	20.13	18.25
32		3.4	3.4	1.8	1.8	0.2	0.4	0.1	0.2	1.2	0	2	1.3	2.9	4.8	4.3	4.3	3.7	2.5		31.08	29.3	17.27	18.77	17.71	21.24	25.94	22.87	23.01	19.03	18.12	23.17	18.17	18.94	24.54	16.63	17.48	25.17
33		3.3	3.1	0.8	0.6	0.5	0.5	1.8	2.9	0.6	0.6	0.7	1.2	4.2	3.4	3.4	2.2	2.9	2.5		19.77	21.97	47.29	20.95	21.39	25.7	21.05	17.96	29.41	17.58	29.04	31.57	24.19	26.05	26.56	27.18	24.34	28.55
34		2.6	3.5	0.8	1.3	0.3	2.6	2.9	0.1	0.8	0.7	2.3	2.1	2.8	2.5	3.7	4.4	2.6	1.9		18.71	18.92	37.46	29.11	20.7	25.2	21.08	24.28	26.01	28.18	27.51	24.26	25.71	27.77	22.51	21.71	20.28	23.58
35		4.5	4.1	2.9	2.8	4.5	2.8	2.8	3.1	3.8	3.4	2.7	3.4	5.4	3.9	5.2	5.6	3.7	3.8		36.23	28.66	34.77	32.77	20.87	26.45	27.3	28.16	27.86	29.43	31.32	30.22	31.07	33	26.66	23.86	31.47	26.54
36		1.2	2	7	2.3	1.3	0.2	1.7	0.6	0.6	1.1	0.1	1.5	1.7	2.4	2.8	1.5	1.1	1.5		28.55	35.74	19.32	22.29	23.28	26.28	24.28	24.35	27.45	27.01	26.12	28.28	26.75	26.3	22.52	22.79	21.62	20.08
37		3.6	4.1	0.9	0.8	2.2	3.7	0.8	0.4	1.3	1.4	1.2	1.3	4.3	1.4	2.3	0.5	1.7	1		23.45	26.61	18.35	19.1	20.65	19.86	26.89	24.52	28.24	25.93	29.17	26.53	23.22	25.56	28.24	25.08	28.63	27.16
38		0.4	4.1	3.3	3.4	1	2.3	2.6	1.7	1.7	1.5	2.2	2.5	3.5	2.9	3.8	3.3	3	3.1		14.75	11.84	10.72	8.78	11.23	9.65	13.88	13.89	15.07	12.09	12.92	12.66	13.51	13.97	11.97	12.08	12.08	12.64
39		4.3	5.8	3	5.3	2.7	5.5	5.7	3.6	3.5	3.1	1.6	1.4	3.4	3.9	4.1	4.1	4.7	3		22.84	19.14	19.13	18.37	18.64	17.8	22.59	32.51	25.07	28.02	23.71	18.72	23.72	23.53	23	21.91	22.82	26.6
40		1.5	1.4	3.5	10.1	2	1.8	2.4	3.1	0.5	1.6	1.7	2	4.2	2.8	4.7	5.2	2.8	3.3		13.34	20.94	10.01	8.04	19.76	28.46	18.27	10.6	21.39	18.93	24.49	21.77	20.06	19.45	16.21	13.96	15.5	13.94
41		12.1	13.2	10	7.4	10.7	12.4	12.7	9.4	15.5	13.3	14.9	15.4	15.2	15.2	15.6	15.5	15	15.9		10.89	18.39	12.67	13.59	13.67	14.16	10.42	10.96	14.59	12.58	14.36	14.55	13.14	12.77	13.43	12.96	12.4	11.64
42		1.8	1.5	1.3	2.3	2.1	1.3	1.1	1.4	1.6	1.2	2.2	1.8	2.5	3.4	3.3	4.7	1.3	1.3		28.74	24	21.6	28.44	25.28	20.93	31.11	24.65	35.2	37.55	29.13	27.33	31.06	25.89	31.18	28.3	32.08	28.45
43		1.7	4	2.6	5.9	4.8	6.1	4.2	2.1	4.2	3.4	1.9	2.5	3.1	0.9	1.4	0.7	1.9	2.9		14.52	11.45	14.18	11.51	9.39	15.1	13.3	12.98	12.92	11.54	11.61	12.27	16.81	15.29	12.89	12.22	12.95	11.95
44		6.5	5	3.6	0.9	3.5	1.7	2.9	2.9	0.4	3.1	2	2.8	3	0.5	2.9	3.8	2	5.1		9.29	9.69	12.62	11.04	11.31	10.55	9.42	12.27	11.81	9.23	11.59	12.73	11.96	13.43	10.71	8.01	12.76	11.77
45		2.8	2.3	2	1.4	2.5	4.3	1.6	3.5	3	2.4	2.3	2	4.2	2.7	3.7	2.3	2.8	2.4		34.95	31	19.23	61.88	35.52	43.7	25.04	21.77	35.37	26.41	36.84	36.63	31.15	32.82	36.55	38.53	33.29	33.38
46		2.8	3.3	1.5	0.5	0.2	0.3	2.1	2.8	0.9	2.2	2.6	2.1	3.4	3.6	3.3	3.7	2.3	2.3		26.43	24.26	25.12	31.18	23.45	24.07	29.92	25.62	27.47	16.41	26.49	28.15	26.83	26.07	23.77	28.82	27.11	26.3
47		20.1	19	37.7	30.1	25.1	27.3	32.1	32.6	31.9	33.1	29.6	30.3	24.6	25.8	26.8	27.6	31.6	32.6		11.67	13.98	17.41	13.7	12.24	12.82	19.34	13.05	16.41	15.39	13.34	14.24	15.67	14.9	15.55	13.06	13.31	13.28
48		0.8	3	1.7	2.2	2.1	0.7	3.3	3.5	1.9	1.7	0.5	0.8	0.5	1.1	0.1	0.2	0.2	1.2		26.94	25.65	30.72	30.14	26.91	25.27	23.96	23.99	28.62	29.89	32.4	29.11	29.94	29.58	32.74	31.67	29.5	27.19
49		9.1	12.3	15.7	12.1	12.1	12.7	9.7	9.6	8.8	10	12.7	13	16.5	14.2	16.5	18.2	14.7	12.3		23.24	21.64	23.58	23.98	22.03	22.15	27.26	30.97	23.91	10	22.09	13	23.39	14.2	22.08	23	24.2	33.88
50		2.5	2	2.2	0.8	1.3	0.7	3.2	3.6	4.8	0.8	0.9	0.6	2.7	3.1	1.5	3.2	2.8	0.9		16.21	33.73	29.95	27.46	23.92	22.28	21.4	19.05	22.19	22.78	34.3	31.82	29.37	31.92	28.93	31.08	28.49	28.44
51		2.7	3.6	0.8	0.6	2.1	2.4	2.6	1.1	2.3	2.2	1.4	1.3	2.5	2.4	4.6	3	1.6	3		18.38	22.37	24.31	23.99	19.67	22.72	24.58	22.53	29.74	22.41	26.32	23.87	24.54	23.77	2.7	21.47	22.09	20.12
52		7	4.9	0.3	3.3	0.5	1.5	1.6	1.8	4.4	6.4	2.2	2.7	1.8	3	1	3	1.3	1.4		19.2	16.44	20.91	13.76	11.27	9.69	14.85	14.12	14.56	12.82	10.94	10.51	15.18	15.66	15.27	15.61	15.42	15.07
53		3	2.9	1.7	3.6	0.5	1.5	0.9	2.2	0.2	0.2	1.4	1.6	3.2	3.9	4.1	2.7	1.9	1.9		24.58	22.34	25	25.67	27.29	28.01	26.98	24.85	24.15	29.9	30.19	28.19	27.92	27.47	16.12	31.06	24.71	24.96
54		2.3	2.3	1	3.4	3.1	0.2	2	1.9	0.6	0.5	0.7	3.5	0.9	3.5	2.1	3.4	1.3	1.2		17.84	25.38	17.4	21.45	18.44	19.99	27.45	24.37	25.13	22.5	22.92	22.41	22	21.89	19.25	19.92	22.83	22.51
55		25.9	25.8	26.8	28	31.2	32.1	27.5	28.1	22.3	33.4	32.6	33.5	32.2	33.2	29.6	30.9	34.2	35.1		15.14	14.66	14.29	18.26	17.2	16.28	17.69	17.66	18.06	18.22	19.12	17.63	16.53	16.22	16.21	17.93	17.21	17.32
56		3.7	3	4.3	5	6	6	4	4.8	3.3	3	3.9	3.1	4.7	4.5	4.2	4.5	5	5		26.97	22.59	17.29	20.56	19.96	24.82	19.79	25.74	20.82	22.39	27.64	25.06	25.38	28.76	26.63	24.59	25.34	25.92
57		8.9	8.9	7.5	6.5	6	5.7	6.3	6.1	4.4	4.6	8.4	8.3	7.4	8.6	7.8	8.5	7	7.3		13.14	12.48	12.21	13.09	10.75	10.24	12.8	12.18	12.06	12.37	12.01	12.64	12.4	12.13	12.69	12.62	11.58	11.37
58		6.5	5.9	4.6	4	6.6	5	3.9	2.3	4.6	3.8	6.1	6.5	7.5	6.8	6.7	6.7	6.5	6.6		24.07	23.46	18.57	18.88	14.3	14.79	21.07	18.57	19.35	19.23	17.62	18.2	19.33	18.1	18.54	17.9	17.64	17.91
59		9.3	8.9	7.5	6.4	12.4	13.1	7.8	9.9	9.4	9.5	10.1	9	10.9	10.9	12.3	9.3	13	14.8		17.54	18.58	21.18	28.03	19.44	20.24	18.41	22.08	18.29	19.91	19.35	18.55	18.85	18.98	17.95	18.88	16.85	15.39
60		1.6	3.3	2.5	4.3	0.9	0.8	2.8	2.8	2.5	2.2	1.7	2	2.9	2.8	3.7	4.2	2.1	2.9		31.69	25.99	22.54	17.04	22.45	21.94	26.72	30.49	27.78	26.18	38.37	29.46	26.65	27.75	25.79	29.57	25.69	28.81
61		2.4	2	0.8	3.3	1.1	0.6	3	3.1	1	1.6	2.2	1.4	2.8	3.1	3.1	3.6	2.2	2		32.26	28.44	30.25	35.96	30.52	28.19	25.92	23.1	28.72	30.36	30.49	29.16	29.09	27.83	26.9	25.53	32.82	30.27
62		7.3	6.9	3.6	1	6.2	6.6	5.2	6.1	7.6	6.8	8.2	7.6	9.6	8.9	8.9	9.2	7.9	7.8		25.93	29.9	24.02	28.18	23.45	22.64	19.91	19.24	25.15	27.92	22.45	23.46	20.54	23.22	25.04	24.5	24.99	23.3
63		2.1	1.7	4.7	1.6	0.4	0.4	2.2	3.4	5.4	2.6	3	2.1	3.8	3.6	3.4	3.3	3	2.1		38.62	25.49	21.39	22.09	30.96	37.99	29.65	28.1	23.3	29.85	32.08	26.65	26.36	30.43	26.61	30.6	28	32.27
64		5.3	2.5	1.6	5.1	3.3	1.4	4.6	5.4	3.1	3.5	3.8	4.2	3.5	5.7	4.2	4.3	4.1	3		38.2	43.58	14.87	21.33	19.27	21.23	22.67	22.79	22.45	20.64	26.45	26.97	24.89	24.2	23.49	28.6	27.41	27.64
65		12.7	10.5	11	10.1	11.3	12.6	13	14.8	9.4	10.9	21	20.3	16.1	14.4	18	17.3	19.3	18.9		21.14	28.38	22.29	17.09	21.76	22.08	16.81	18.59	26.6	45.13	18.82	17.37	20.29	21.72	19.63	18.61	17.72	18.3
66		15.8	16.3	13	15.8	15.8	12.2	13.5	14.5	14.2	14.3	18.4	18	18.2	17.9	19.3	19.4	19.2	18.8		18.87	17.36	19.83	15.16	15.5	16.57	17.28	17.41	19.85	18.71	20.98	21.15	19.11	18.54	16.05	18.61	17.85	19.42
67		4.5	4.4	3.9	2.6	3.4	3.5	0	2.8	2.8	3.5	3.3	3.2	2.1	1.6	2.5	4.1	2.6	3		22.36	25.58	18.71	22.58	19.53	22.86	33.85	33.97	28.27	35.35	27.34	20.8	27.59	23.82	22.93	20.16	25.25	21.23
68		4.3	3.1	4.5	3.8	5.6	5.2	3.3	3	1.8	3.2	3.4	2.2	2.7	2.8	3.1	1.9	3.2	2		24.97	28.66	27.68	22.18	28.88	46.12	30.04	26.11	46.75	27.34	35.78	35.54	37.29	38.59	28.35	34.08	34.04	34.19
69		9.5	10.1	15.9	16.9	17.6	16.8	8.7	10	14.1	16.3	14.2	13.1	15.2	11.8	17.9	12.3	13	15.7		7.94	8.37	7.13	7.94	7.85	7.39	9.24	9.59	9.19	10.83	8.14	8.42	7.7	8.48	8.2	8.73	9.11	8.99
70		20.2	17.1	15.6	15.9	11.3	11.7	17.4	15.8	15.1	13.9	18.6	16.8	13	11.8	13.8	12.2	15.1	14.9		13.51	11.62	10.18	11.37	10.72	7.33	13.07	13.95	12.49	11.77	11.65	12.04	11.38	11.54	10.96	11.23	11.94	12.49
71		1.4	2.1	4.9	1.2	3	3	1.6	1.6	0.8	0.5	1.9	1.9	3.5	4	3.6	3.3	2.3	2.6		22.07	27.41	19.25	25.02	23.69	24.84	23	19.52	26.47	28.38	22.18	22.77	23.94	23.34	21.03	19.33	25.16	22.31
72		8.1	9	4.4	6.3	3.5	2.6	2.1	1	0.7	0.6	8.3	8.6	9.2	8.8	9.6	10.9	11.5	12.1		23.12	34.93	24.71	29.41	51.86	33.93	30.61	30.65	38.69	31.4	29.38	33.76	29	26.47	27.77	24.12	32.62	29.68
73		3.6	4.5	1.5	0.8	1.7	1.7	0.9	3.4	2.7	2.5	2.2	0	0.8	0.2	2	1.7	1.8	0		16.15	19.39	19.25	15.59	20.57	23.98	20.14	21.84	17.37	24.16	25.69	25.94	21.74	23.54	19.89	19.79	21.92	20.94
74		2.5	2.2	2	2.1	0.5	2.8	0.2	1.6	0.3	1.9	2.1	1.3	1	5	3.5	0.5	2.5	4.4		20.26	19.37	17.47	24.16	18.76	18.59	27.22	19.26	21.2	18.91	22.83	22.74	26.54	24.63	21.03	20.74	23.25	21.97
75		3.2	2.5	4.4	1.8	2.6	3.3	1.6	2.4	3.9	3.2	1.7	1.1	3.2	1.8	2.8	2	2.5	1		29.93	29.03	25.44	35.38	28.98	32.01	47.45	21.84	30.45	36.98	32.84	34.22	29.54	30.29	29.94	34.39	30.25	35.06
76		2.5	2.4	2	1.1	3.4	3.5	2.4	1.6	1.6	1.7	1.6	1	2	1	2.1	1.2	2.3	1.6		5.25	5.03	5.19	4.2	5.12	5.26	5.85	5.52	6.2	5.96	5.84	6.61	6.93	6.6	5.67	5.85	5.47	5.64
77		2.5	2.6	2.2	3.6	1.5	1.4	3	3.2	2.4	2.4	1.8	0	4.9	3.6	4.2	3.3	2.4	1.1		22.82	26.53	28.84	18.87	27.43	21.9	20.74	21.28	25.47	23.33	26.36	26.51	25.55	23.04	26.19	25.07	26.22	25.18
78		0.4	0.5	3.2	3.9	3.3	3	2.7	1.3	3.2	1.7	2.6	3.6	5	4.9	4	5.6	3.2	4.5		17.65	18.54	16.9	16.72	15.17	16.26	17.35	23.71	19.05	18.27	17.28	18.7	18.98	18.52	17.79	18.21	17.22	17.24
79		3.3	3.8	2.8	2.8	2.7	3.7	3.3	0.1	3.4	1.2	1.1	1.2	1.1	2.5	1.9	1.2	2	2.5		19.29	17.19	17.06	19.24	17.52	17.1	21.64	23.36	17.71	18.4	18.5	18.34	21.35	20.26	20	19.24	17.44	17.06
80		1.9	1.4	0	1.1	2.1	2	0.4	1.9	1.4	0.7	2.4	3	2.7	1.9	4.1	3.1	2.3	2.5		16.32	15.43	37	13.97	26.43	25.05	24.31	22.76	23.81	19.71	19.89	18.88	19.59	20.46	19.12	18.56	21.58	18.65
81		7.9	7	3.8	0.9	4.4	0.2	3.4	2.2	6.3	5.8	2.5	3.2	4	2.2	4.2	3.5	2.4	2.8		19.2	31.07	28.03	40.3	23.67	29.37	21.3	33.7	25.37	30.02	26.77	30.9	28.69	30.54	30.22	31	18.16	30.37
82		4.3	3.3	2.6	2.5	2.5	3.9	2.6	2.5	1.6	2.8	0.8	1.4	1.1	0.5	3.1	4.5	3.2	3.3		19.17	18.58	27.06	21.42	22.16	20.11	20.96	19.09	22.3	23.08	22.52	25.58	23.38	24.61	23.05	21.42	22.06	22.29
83		2.3	3.2	1.3	2.7	4.4	0	1.8	1.2	0.2	2.5	2.5	1.5	2.8	0.9	3.1	3.1	3.4	3.1		30.37	23.8	16.11	19.29	22.85	17.66	20.67	21.45	27.5	33.48	26.65	25.17	30.07	27.63	28.75	24.23	27.48	23.1
84		2.3	1.4	0.6	4	2.3	0.2	3.2	2.8	0.3	1.2	1.3	1.4	2	2.6	2.8	3.7	0.8	1.3		16.6	16.31	28.07	20.21	17.92	16.58	13.38	12.81	17.69	19.69	18.78	17.24	18.56	18.15	16.24	17.61	20.03	18.81
85		3.9	3.3	3.7	2.5	3.2	2.9	3.4	2.6	3	2.7	3.6	3.9	6.2	5.7	5.3	5.6	4.7	4.5		32.31	27.87	25.39	23.74	27.38	23.69	26.98	32.04	26.19	27.83	28.48	31.36	25.01	23.73	27.71	25.23	25.13	25.07
86		5	3.6	4.3	5.7	4.7	4	2.4	0.6	1.4	0.4	2.6	2.9	3.6	3.7	3.5	3.5	2.5	3.7		23.61	22.23	21.86	19.27	24.3	23.75	21.33	21.33	21.79	24.03	25.19	24.19	26.03	28.48	24.98	25.9	20.77	21.79
87		2.6	2.8	1.1	0.9	2.6	1.8	3.5	1.8	2	2.4	0.5	0.5	2	2.5	0.1	0.1	2.5	1.7		25.08	28.96	30.4	41.54	28.17	28.9	24.62	24.61	30.2	28.83	31.86	35.3	31.33	33.88	33.16	32.12	22.76	26.26
88		8.3	8	10.1	8.7	11.5	11.3	6.9	7.6	10.6	11.5	11.7	10.9	12.1	11.2	11.2	12.5	10.9	11.6		9.53	8.72	10.93	9.9	7.17	8.67	9.34	9.17	7.77	7.87	8.57	9.14	9.08	9.05	8.46	8.62	9.02	8.81
89		3.3	2.5	2.9	1.3	2.1	2.4	3.1	3.4	2.6	2	2.1	1.5	4.2	3.9	4.9	4.9	3.4	3.9		22.58	22.39	24.93	25.51	28.86	25.74	21.52	22.48	26.41	24.77	28.09	26.33	26.78	27.67	25.6	24.35	26.26	25.67
